# Supplementary material for: Immunomodulatory Effect of Vitamin D after Allogeneic Stem Cell Transplantation: Results of a Prospective Multicenter Clinical Trial
Source: Oxford University Press journal article supplement (doi:10.1158/1078-0432.ccr-16-0238), 2016-06-29
Supplement: 10780432ccr160238-sup-161109_2_supp_3507191_y7n1yg.docx [file 10780432ccr160238-sup-161109_2_supp_3507191_y7n1yg.docx]

**Supplementary Table 1, online only. Toxicity.**

| Toxicity1 | Global | LdD | HdD |
| --- | --- | --- | --- |
| Nausea  All grades  Grade 1  Grade 2-3 | 10  5  5  - | 3  2  1  - | 7  3  4  - |
| Diarrhea  All grades  Grade 1  Grade 2-3 | 10  5  5  - | 3  2  1  - | 7  3  4  - |
| Cardiac toxicity | 0 | 0 | 0 |
| Hepatic toxicity | 0 | 0 | 0 |
| Neurologic toxicity | 0 | 0 | 0 |
|  |  |  |  |
| Hypercalcemia | 0 | 0 | 0 |
| Graft failure2 | 0 | 0 | 0 |

1Toxicity criteria by National Cancer institute for hematology/oncology trials: grade 1 or mild, with no or mild symptoms (no intervention required); grade 2 or moderate, minimal intervention indicated (some limitation of activities); grade 3 or severe but not life-threatening, hospitalization required (limitation of patient's ability to care for him/herself). 2Median number of CD34 infused: 5,5x106 / kg (range 1,2-12,40 x 106/Kg). Neutrophil count > 0.5 x 109/L and stable platelet count over 20 x 109/L were reached at a median of 16 days (range, 10-34 days) and 13.1 days after transplantation (range, 7-32 days), respectively.
