# Supplementary material for: Immunomodulatory Effect of Vitamin D after Allogeneic Stem Cell Transplantation: Results of a Prospective Multicenter Clinical Trial
Source: Oxford University Press journal article supplement (doi:10.1158/1078-0432.ccr-16-0238), 2016-06-29
Supplement: 10780432ccr160238-sup-161109_2_supp_3507195_p7n1pg.docx [file 10780432ccr160238-sup-161109_2_supp_3507195_p7n1pg.docx]

**Supplementary Table 3, online only. Serum levels of cytokines by flow cytometry**

| Median (SEM)  pg/mL | Healthy controls | CG | LdD | HdD |
| --- | --- | --- | --- | --- |
| IFN-γ  *Day +1*  *Day +7*  *Day +14*  *Day +21*  *Day +56*  *Day +100* | **7,97(0,46)** | 9,10(0,87) *♦  11,93(3,10)  18,97(5,67) ♦  7,91(0,73)  9,36(1,18)  8,94(1,17) | 6,53(0,47) *  12,47(2,58)  8,41(0,88)  8,65(1,66)  7,96(0,82)  7,00(0,37) | 6,22(0,55) ♦  17,3(8,36)  7,79(1,42) ♦  6,15(0,73)  6,22(0,51)  7,83(1,15) |
| TNF-α  *Day +1*  *Day +7*  *Day +14*  *Day +21*  *Day +56*  *Day +100* | **7,36(0,11)** | 8,31(0,72)  7,53(0,30) ♦  8,33(0,36) ♦  7,77(0,37)  7,54(0,28)  7,52(0,49) | 6,73(0,21)  7,06(0,16)  7,23(0,17)  9,90(2,85)  6,88(0,16)  6,70(0,18) # † | 6,56(0,27)  6,68(0,25) ♦  6,92(0,25) ♦  13,70(6,78)  7,69(0,69)  9,80(1,82) † |
| IL2  *Day +1*  *Day +7*  *Day +14*  *Day +21*  *Day +56*  *Day +100* | **6,73(0,39)** | 8,48(0,20) **#*♦**  8,50(0,16) **#*♦**  8,69(0,20) **#*♦**  8,33(0,12) **#*♦**  8,43(0,20) **#*♦**  8,81(0,41) **#*♦** | 7,86(0,48) *****  7,98(0,43) *****  8,04(0,53) *****  8,03(0,49) *****  7,80(0,52) *****  7,17(0,51) ***** | 7,61(0,31)**♦**  7,42(0,20)**♦**  7,19(0,26)**♦**  7,28(0,25)**♦**  7,52(0,28)**♦**  7,34(0,33)**♦** |
| IL4  *Day +1*  *Day +7*  *Day +14*  *Day +21*  *Day +56*  *Day +100* | **8,67(0,19)** | 7,65(0,15) **#**  7,37(0,12) **#**  7,84(0,22) **#**  7,48(0,11)  7,55(0,25) **#**  7,67(0,51) **#** | 7,58(0,19) **#**  7,95(0,17) **#**  7,92(0,42)  7,67(0,25) **#**  7,83(0,26)  7,60(0,19) **#** | 6,98(0,43)  7,12(0,40)  7,11(0,39) **#**  7,20(0,39)  7,40(0,37)  7,76(0,44) |
| IL6  *Day +1*  *Day +7*  *Day +14*  *Day +21*  *Day +56*  *Day +100* | **9,13(0,58)** | 45,99(12,62) **#**  100,12(34.43) **#**  56,49(17,24) **#**  22,50(3,10) **#**  18,20(2,13) **#**  18,69(2,16) **#** | 30,10(8,64)  78,13(20,17) **#**  51,80(12,58) **#**  30,57(8,84) **#**  16,41(4,40)  15,72(2,75) | 53,23(21,56) **#**  95,85(23,62) **#**  36,77(7,49) **#**  25,62(9,44)  16,31(3,38)  14,96(2,35) |
| IL10  *Day +1*  *Day +7*  *Day +14*  *Day +21*  *Day +56*  *Day +100* | **8,98(0,47)** | 9,41(0,46) *****  10,83(1,15)  12,00(0,95)  10,54(0,48)  10,31(0,45) *****  10,29(0,58) | 8,33(0,29) *****  9,57(0,69)  12,24(2,63)  11,12(1,27)  8,71(0,26) *****  9,49(0,27) | 8,24(0,52)  11,33(1,72)  12,45(1,40) **#**  10,49(0,55)  10,58(1,08)  9,53(0,54) |

SEM: standard error of the mean. CG: control group, LdD: low dose group (1000 UI); HdD: high dose group (5000 UI); IFN: interferon; TNF tumor necrosis factor; IL: interleukin. #significant differences between healthy and treatment group (p<0.05) *significant differences between CG and LdD (p<0.05) ♦significant differences between CG and HdD (p<0.05) † significant differences between LdD and HdD (p<0.05)
